# Supplementary material
Source: publisher site journal article supplement (https://www.dovepress.com/article/103874)
Supplement: Supplementary file 1 [file get_supplementary_file.php]

## Sickle Cell Antibiotic Adherence Level Evaluation (SCAALE)

Giving medicine every day can be a challenge. These questions ask about your child's antibiotic medicine. Please tell us what actually happened during the **past three months**. There are no right or wrong answers. Please use the scale below.

|                         |                                                                                   |                                                         |
|-------------------------|-----------------------------------------------------------------------------------|---------------------------------------------------------|
| <b>Rarely or Never:</b> |  | <b>less than half</b> of the time                       |
| <b>Sometimes:</b>       |  | <b>at least half</b> of the time                        |
| <b>Often:</b>           |  | at least <b>80%</b> of the time                         |
| <b>Almost Always:</b>   |  | at least <b>90%</b> of the time, almost all of the time |
| <b>Always:</b>          |  | <b>100%</b> of the time, all of the time                |

|                                                                                                                                                    | Rarely/<br>Never         | Sometimes                | Often                    | Almost<br>Always         | Always                   |
|----------------------------------------------------------------------------------------------------------------------------------------------------|--------------------------|--------------------------|--------------------------|--------------------------|--------------------------|
| <b>Time</b>                                                                                                                                        |                          |                          |                          |                          |                          |
| 1. My child takes the antibiotic everyday.                                                                                                         | <input type="checkbox"/> |
| 2. My child takes the antibiotic in the morning and evening.                                                                                       | <input type="checkbox"/> |
| 3. My schedule makes it hard to give my child the antibiotic in the morning and evening.                                                           | <input type="checkbox"/> |
| 4. The times that my child takes the antibiotic have to be changed because of other responsibilities like work, other children, appointments, etc. | <input type="checkbox"/> |

|                                                                                                                                                         | Rarely/<br>Never         | Sometimes                | Often                    | Almost<br>Always         | Always                   |
|---------------------------------------------------------------------------------------------------------------------------------------------------------|--------------------------|--------------------------|--------------------------|--------------------------|--------------------------|
| <b>Dose</b>                                                                                                                                             |                          |                          |                          |                          |                          |
| 5. It is hard to give the correct dose of the antibiotic to my child.                                                                                   | <input type="checkbox"/> |
| 6. When my child is given the antibiotic, he/she behaves in a way that he/she does not get the full dose (e.g., spits out dose, refuses to open mouth). | <input type="checkbox"/> |
| 7. The adult(s) who give the child the antibiotic know the exact dose to give.                                                                          | <input type="checkbox"/> |
| 8. At times, my child does not get the right dose of antibiotic.                                                                                        | <input type="checkbox"/> |

|                                                                                                                                                 | Rarely/<br>Never         | Sometimes                | Often                    | Almost<br>Always         | Always                   |
|-------------------------------------------------------------------------------------------------------------------------------------------------|--------------------------|--------------------------|--------------------------|--------------------------|--------------------------|
| <b>Pharmacy</b>                                                                                                                                 |                          |                          |                          |                          |                          |
| 9. I have trouble getting to the pharmacy (due to distance, hours, location, etc.) to pick up the antibiotic.                                   | <input type="checkbox"/> |
| 10. I get enough of the antibiotic from my pharmacy at a time.                                                                                  | <input type="checkbox"/> |
| 11. I run out of the antibiotic because I do not have an active prescription.                                                                   | <input type="checkbox"/> |
| 12. Problems at the pharmacy (such as errors in filling the prescription) make it hard for me to give the antibiotic to my child as prescribed. | <input type="checkbox"/> |

| <b>Plan</b> |                                                                                          | Rarely/<br>Never         | Sometimes                | Often                    | Almost<br>Always         | Always                   |
|-------------|------------------------------------------------------------------------------------------|--------------------------|--------------------------|--------------------------|--------------------------|--------------------------|
| 13.         | I plan ahead so I have enough antibiotic at home.                                        | <input type="checkbox"/> |
| 14.         | I run out of antibiotic before I go to the pharmacy for more.                            | <input type="checkbox"/> |
| 15.         | I keep track of when I need more of the antibiotic at home.                              | <input type="checkbox"/> |
| 16.         | I make a plan to have enough antibiotic when we travel or are away from home for a time. | <input type="checkbox"/> |

| <b>Remember</b> |                                                                                             | Rarely/<br>Never         | Sometimes                | Often                    | Almost<br>Always         | Always                   |
|-----------------|---------------------------------------------------------------------------------------------|--------------------------|--------------------------|--------------------------|--------------------------|--------------------------|
| 17.             | I forget to give my child his/her antibiotic.                                               | <input type="checkbox"/> |
| 18.             | Remembering to give my child the antibiotic is difficult.                                   | <input type="checkbox"/> |
| 19.             | I forget to leave antibiotic doses/supply with other caretakers who give my child medicine. | <input type="checkbox"/> |
| 20.             | When other things come up, I forget to give my child his/her antibiotic until later.        | <input type="checkbox"/> |

| <b>Communicate</b> |                                                                                                                  | Rarely/<br>Never         | Sometimes                | Often                    | Almost<br>Always         | Always                   |
|--------------------|------------------------------------------------------------------------------------------------------------------|--------------------------|--------------------------|--------------------------|--------------------------|--------------------------|
| 21.                | I call one of my child's doctors when my child has a fever over 101°F.                                           | <input type="checkbox"/> |
| 22.                | I call the sickle cell doctor when I have sickle cell related health concerns.                                   | <input type="checkbox"/> |
| 23.                | I contact one of my child's doctors when my child has health problems.                                           | <input type="checkbox"/> |
| 24.                | I contact one of my child's doctors when I have a question or am not sure about my child's antibiotic treatment. | <input type="checkbox"/> |

| <b>Environment</b> |                                                                                                    | Rarely/<br>Never         | Sometimes                | Often                    | Almost<br>Always         | Always                   |
|--------------------|----------------------------------------------------------------------------------------------------|--------------------------|--------------------------|--------------------------|--------------------------|--------------------------|
| 25.                | Financial or insurance problems prevent me from filling the antibiotic prescription.               | <input type="checkbox"/> |
| 26.                | Problems finding transportation prevent me from giving my child the antibiotic at the right times. | <input type="checkbox"/> |
| 27.                | My child misses the antibiotic doses because of stress and chaos in the environment.               | <input type="checkbox"/> |
| 28.                | I do not have enough help to give the antibiotic to my child at the right times.                   | <input type="checkbox"/> |

---

**Other Caretakers**

29. How often is someone else (another caretaker) responsible for giving your child the antibiotic?

**Rarely or Never**

(once a week or less)

**Some Days**

(2 days a week)

**Several Days**

(3 or more days a week)

**Many Days**

(5 days of the week)

**Every Day**

(every day of the week)

---

**Please answer the questions below about the other caretaker(s) who give your child the antibiotic. Skip these questions if you answered “Never” to the question above.**

|                                                                                                                                   | Rarely/<br>Never         | Sometimes                | Often                    | Almost<br>Always         | Always                   |
|-----------------------------------------------------------------------------------------------------------------------------------|--------------------------|--------------------------|--------------------------|--------------------------|--------------------------|
| 30. Other caretakers don't give my child the antibiotic as prescribed.                                                            | <input type="checkbox"/> |
| 31. Other caretakers understand the importance of the antibiotic.                                                                 | <input type="checkbox"/> |
| 32. It is hard to tell other caretakers about giving the antibiotic (correct dose, time of day, whether the dose was given, etc.) | <input type="checkbox"/> |
| 33. I am not sure whether the other caretakers give the antibiotic in the right way                                               | <input type="checkbox"/> |

---
